# Supplementary material for: Exploring voice as a digital phenotype in adults with ADHD
Source: Springer Nature journal article supplement (doi:10.1038/s41598-025-01989-x), 2025-05-24
Supplement: MOESM1 [file 41598_2025_1989_MOESM1_ESM.pdf]

## Supplementary Information

**Data storage:** Data are stored at Charité Universitätsmedizin Berlin, Department of Psychiatry, Campus Benjamin Franklin, Berlin, Germany.

### **Box S1** Inclusion and Exclusion criteria

#### **Inclusion Criteria:**

1. Age 18-59.
2. Written informed consent.
3. Adult ADHD / Non-ADHD/ other disorders according to the fourth version of the Diagnostic and Statistical Manual for Mental Disorders (DSM-IV)
4. Normal vocal functioning, negative history for voice or laryngeal disorders.
5. Currently euthyroid condition; in case of past history of thyroid disease and need for current pharmacological treatment, patient needs to be on stable medication for at least 4 weeks.

#### **Exclusion Criteria:**

1. Severe mental conditions such as schizophrenia and psychotic disorders not otherwise specified, severe depressive episode, severe substance use disorder.
2. Positive drug tests.
3. Severe medical condition such as epilepsy.

### **Box S2** Length of feature timewindows in ms:

20, 25, 32, 40, 50, 63, 79, 100, 126, 159, 200, 252, 318, 400, 504, 635, 800, 1008, 1270, 1600, 2016, 2540, 3200, 4032

**Table S1** Distribution of recordings

|                       | male | female | total |
|-----------------------|------|--------|-------|
| All recordings        | 505  | 501    | 1005  |
| ATT                   | 167  | 123    | 290   |
| COM                   | 149  | 134    | 283   |
| ADHD with comorbidity | 175  | 129    | 304   |
| ADHD with stimulants  | 32   | 39     | 71    |
| Healthy Controls      | 79   | 149    | 228   |
| Psychiatric Controls  | 43   | 76     | 119   |
| Excluded              | 66   | 19     | 85    |

ATT = inattentive ADHD subgroup; COM = combined inattentive and hyperactive / impulsive ADHD subgroup; HC = healthy controls

**Table S2** Education

|                  | No school certificate | High School Certificate | High school advanced certificate (German Abitur) | Further education/ university |
|------------------|-----------------------|-------------------------|--------------------------------------------------|-------------------------------|
| All participants | 10                    | 268                     | 257                                              | 225                           |
| ATT              | 1                     | 76                      | 66                                               | 55                            |
| COM              | 6                     | 81                      | 65                                               | 37                            |
| HC               | 0                     | 38                      | 72                                               | 94                            |
| PC               | 1                     | 41                      | 31                                               | 27                            |
| Excluded         | 2                     | 32                      | 23                                               | 12                            |

ATT = inattentive ADHD subtype; COM = combined inattentive and hyperactive / impulsive ADHD subtype; HC = healthy controls; PC = psychiatric controls

**Table S3** Diagnostic distribution of clinical controls

| Diagnosis                         | n  |
|-----------------------------------|----|
| Addiction disorder (e.g. games)   | 13 |
| Schizophrenia                     | 3  |
| Bipolar disorder                  | 1  |
| Depressive episode                | 49 |
| Dysthymia                         | 12 |
| OCD, PTSD (ICD-10 Chapter 4)      | 35 |
| Specific phobia                   | 16 |
| Social phobia                     | 11 |
| Anorexia nervosa, Bulimia nervosa | 3  |
| Borderline PD                     | 9  |
| Narcissistic PD                   | 13 |
| Avoidant-restrictive PD           | 10 |
| other PD                          | 17 |

OCD = Obsessive compulsive disorder; PTSD = post-traumatic stress disorder; PD = Personality disorder

**Table S4** Recorded utterances from each participant

| Utterance                         | mean duration (s) |
|-----------------------------------|-------------------|
| Free speech                       | 120               |
| Counting 1-10, two trials         | 22                |
| Reading out single words          | 20                |
| Sounds (3 sec) a: i: u: ɔ̃ f s n  | 21                |
| Recorded material per participant | 183               |

**Table S5** Classification ADHD vs Psychiatric controls

| Group       | AUC  | Precision | Recall | F1   |
|-------------|------|-----------|--------|------|
| All         | 0.60 | 0.91      | 0.61   | 0.71 |
| Male        | 0.57 | 0.94      | 0.62   | 0.71 |
| Female      | 0.53 | 0.87      | 0.56   | 0.63 |
| Age 18 – 31 | 0.60 | 0.96      | 0.53   | 0.64 |
| Age 32 – 59 | 0.61 | 0.92      | 0.61   | 0.70 |

**Table S6** Classification ADHD vs HC with speaker stratified cross-validation

| Group                       |                             | AUC  | Precision | Recall | F1   |
|-----------------------------|-----------------------------|------|-----------|--------|------|
| all                         |                             | 0.77 | 0.82      | 0.86   | 0.83 |
| male                        |                             | 0.70 | 0.82      | 0.94   | 0.87 |
| female                      |                             | 0.82 | 0.84      | 0.74   | 0.78 |
| <b>Age 18 – 31</b>          | all                         | 0.79 | 0.83      | 0.80   | 0.81 |
| <b>(n = 385 recordings)</b> | male (n = 202)              | 0.73 | 0.80      | 0.87   | 0.83 |
|                             | Female (n = 183)            | 0.85 | 0.90      | 0.70   | 0.78 |
| <b>Age 32 – 59</b>          | all                         | 0.70 | 0.81      | 0.88   | 0.84 |
| <b>(n = 416 recordings)</b> | male (n = 193) <sup>1</sup> | 0.56 | 0.84      | 0.96   | 0.89 |
|                             | female (n = 223)            | 0.71 | 0.77      | 0.78   | 0.76 |

HC= healthy control; 1: This calculation should be interpreted with caution, as it suffers from class imbalance with only 30 HC
